# Supplementary material for: Human TSCM cell dynamics in vivo are compatible with long-lived immunological memory and stemness
Source: PubMed Central journal article supplement (PMC6033534; doi:10.1371/journal.pbio.2005523), 2018-06-22
Supplement: pbio.2005523.s002.pdf [file pbio.2005523.s002.pdf]

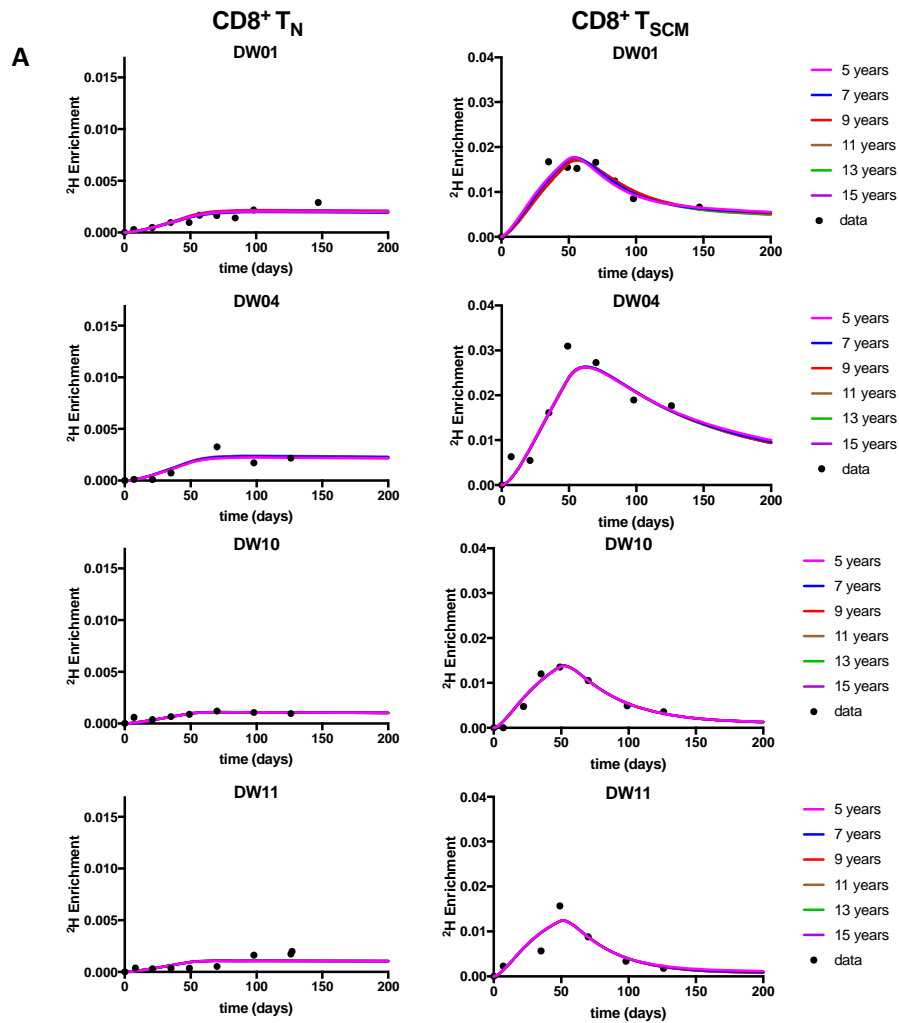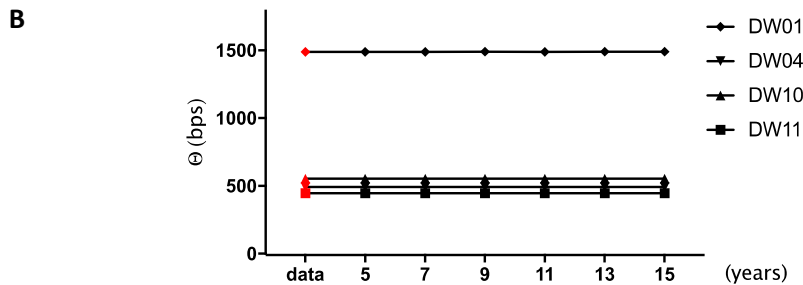

**S2 Fig. CD8<sup>+</sup> T cell data are compatible with a long subpopulation half-life independent of yellow fever virus vaccine data.**

**A)** Observed and fitted label incorporation in CD8<sup>+</sup> naïve and T<sub>SCM</sub> cells when the explicit heterogeneity model was fitted to isotope labelling and telomere length datasets simultaneously, constraining the half-life of the slower subpopulation to lie between 5-6, 7-8, 9-10, 11-12, 13-14 or 14-15 years. Note that the predictions for many of the different half-lives overlaid each other and so cannot be distinguished. **B)** Corresponding fits to the average telomere length differences ( $\Theta$ ) between the T<sub>N</sub> and T<sub>SCM</sub> pools, with experimental data points shown in red. The number of base pairs (bp) lost in each division was taken to be  $\delta = 50\text{bp/division}$ . Experimental data depicted in this figure can be found in S1 Data.
