# Supplementary material for: Human TSCM cell dynamics in vivo are compatible with long-lived immunological memory and stemness
Source: PubMed Central journal article supplement (PMC6033534; doi:10.1371/journal.pbio.2005523), 2018-06-22
Supplement: pbio.2005523.s004.pdf [file pbio.2005523.s004.pdf]

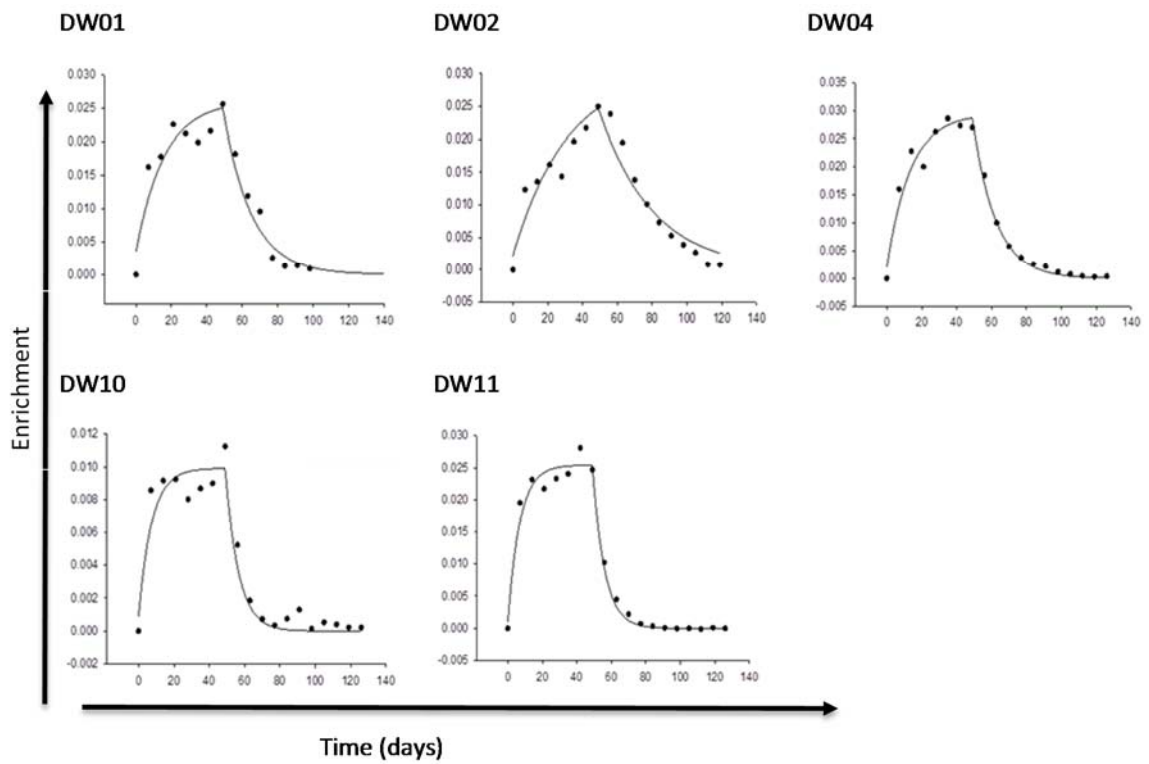

**S4 Fig. Deuterium enrichment in body water.**

Body water enrichment as measured in saliva (dots) with best fit curves (solid line) in all volunteers. Parameter estimates from the model fits are given in S4 Table.
