# Supplementary material for: Human TSCM cell dynamics in vivo are compatible with long-lived immunological memory and stemness
Source: PubMed Central journal article supplement (PMC6033534; doi:10.1371/journal.pbio.2005523), 2018-06-22
Supplement: pbio.2005523.s006.pdf [file pbio.2005523.s006.pdf]

| id     | $P_n$ [day <sup>-1</sup> ]<br>(95% CI) | $p_{s1}$ [day <sup>-1</sup> ]<br>95% CI | $p_{s2}$ [day <sup>-1</sup> ]<br>(95% CI) | $d_{s1}$ [day <sup>-1</sup> ]<br>95% CI | $d_{s2}$ [day <sup>-1</sup> ]<br>95% CI | Self-renewal [d]<br>95% CI        |
|--------|----------------------------------------|-----------------------------------------|-------------------------------------------|-----------------------------------------|-----------------------------------------|-----------------------------------|
| DW01   | 0.0005<br>(0.0003,0.0020)              | 0.005<br>(0,0.2)                        | 0.021<br>(0.0015,0.0661)                  | 0.087<br>(0.003,0.20)                   | 0.0214<br>(0.0016,0.0666)               | 7300<br>(1800,12500)              |
| DW04   | 0.0004<br>(0.0003,0.0008)              | 0<br>(0,0.2)                            | 0.003<br>(0.0001,0.0078)                  | 0.013<br>(0.008,0.35)                   | 0.0033<br>(0.0005,0.0085)               | 2400<br>(1200,5300)               |
| DW10   | 0.0006<br>(0.0005,0.0011)              | 0.025<br>(0,0.1055)                     | 0.002<br>(0,0.0083)                       | 0.028<br>(0.02,0.15)                    | 0.0022<br>(0.0003,0.0094)               | 4800<br>(1400,8400)               |
| DW11   | 0.0003<br>(0.0001,0.0006)              | 0.029<br>(0.0032,0.183)                 | 0<br>(0,0.0081)                           | 0.031<br>(0.02,0.31)                    | 0.0002<br>(0.0001,0.0086)               | 4400<br>(1700,9500)               |
| MEDIAN | <b>0.0005</b><br><b>(0.0003,0.001)</b> | <b>0.015</b><br><b>(0,0.19)</b>         | <b>0.002</b><br><b>(0.0001,0.008)</b>     | <b>0.029</b><br><b>(0.01,0.26)</b>      | <b>0.0027</b><br><b>(0.0004,0.009)</b>  | <b>4600</b><br><b>(1500,8900)</b> |

**S2 Table. Parameter estimates for CD8<sup>+</sup> T<sub>SCM</sub> cells from the explicit heterogeneity model.**

Parameter estimates with 95% CI (in parentheses) obtained by fitting the explicit heterogeneity model to the labelling, telomere length and YFV datasets for CD8<sup>+</sup> T cells simultaneously. The table shows the fitted parameters  $p_n$  (the proliferation rate of the naïve population),  $p_{s1}$  and  $p_{s2}$  (the proliferation rates of the two T<sub>SCM</sub> subpopulations) as well as the derived parameters  $d_{s1}$  and  $d_{s2}$  (the disappearance rates of the two T<sub>SCM</sub> subpopulations) and the degree of self-renewal of the long-lived subpopulation T<sub>SCM2</sub>.  $d_{s1}$  and  $d_{s2}$  were calculated using the steady state constraints  $(1-f)2^k\Delta T_N + p_{s1}T_{SCM1} = d_{s1}T_{SCM1}$  and  $f2^k\Delta T_N + p_{s2}T_{SCM2} = d_{s2}T_{SCM2}$  and the degree of self-renewal of the T<sub>SCM2</sub> subpopulation was calculated as  $1/(d_{s2}-p_{s2})$ . This table is a continuation of the table of parameters in the main text (Table 1).
