# Supplementary material for: Human TSCM cell dynamics in vivo are compatible with long-lived immunological memory and stemness
Source: PubMed Central journal article supplement (PMC6033534; doi:10.1371/journal.pbio.2005523), 2018-06-22
Supplement: pbio.2005523.s007.pdf [file pbio.2005523.s007.pdf]

| id   | weight combination | half-live $T_{SCM1}$<br>[years] | half-live $T_{SCM2}$<br>[years] | $T_{SCM2}/T_{SCM}$ | f            |
|------|--------------------|---------------------------------|---------------------------------|--------------------|--------------|
| DW01 | 0.15*YF+0.35*T     | 0.02                            | 23.87                           | 0.25               | 0.000        |
|      | 0.20*YF+0.30*T     | 0.02                            | 18.67                           | 0.25               | 0.000        |
|      | 0.25*YF+0.25*T     | 0.02                            | 13.92                           | 0.25               | 0.001        |
|      | 0.30*YF+0.20*T     | 0.02                            | 14.15                           | 0.26               | 0.001        |
|      | 0.35*YF+0.15*T     | 0.02                            | 11.20                           | 0.25               | 0.001        |
|      | <b>median</b>      | <b>0.02</b>                     | <b>14.15</b>                    | <b>0.25</b>        | <b>0.001</b> |
| DW04 | 0.15*YF+0.35*T     | 0.18                            | 5.49                            | 0.35               | 0.017        |
|      | 0.20*YF+0.30*T     | 0.18                            | 4.26                            | 0.33               | 0.021        |
|      | 0.25*YF+0.25*T     | 0.14                            | 4.59                            | 0.58               | 0.041        |
|      | 0.30*YF+0.20*T     | 0.14                            | 7.93                            | 0.58               | 0.023        |
|      | 0.35*YF+0.15*T     | 1.84                            | 7.88                            | 0.51               | 0.196        |
|      | <b>median</b>      | <b>0.18</b>                     | <b>5.49</b>                     | <b>0.51</b>        | <b>0.023</b> |
| DW10 | 0.15*YF+0.35*T     | 1.29                            | 14.45                           | 0.52               | 0.087        |
|      | 0.20*YF+0.30*T     | 0.23                            | 6.92                            | 0.44               | 0.026        |
|      | 0.25*YF+0.25*T     | 0.69                            | 9.09                            | 0.51               | 0.075        |
|      | 0.30*YF+0.20*T     | 0.15                            | 7.84                            | 0.52               | 0.020        |
|      | 0.35*YF+0.15*T     | 0.50                            | 6.27                            | 0.53               | 0.083        |
|      | <b>median</b>      | <b>0.50</b>                     | <b>7.84</b>                     | <b>0.52</b>        | <b>0.075</b> |
| DW11 | 0.15*YF+0.35*T     | 0.38                            | 13.43                           | 0.82               | 0.116        |
|      | 0.20*YF+0.30*T     | 2.31                            | 11.20                           | 0.83               | 0.500        |
|      | 0.25*YF+0.25*T     | 0.90                            | 8.39                            | 0.25               | 0.001        |
|      | 0.30*YF+0.20*T     | 0.91                            | 9.36                            | 0.26               | 0.001        |
|      | 0.35*YF+0.15*T     | 0.78                            | 9.87                            | 0.25               | 0.001        |
|      | <b>median</b>      | <b>0.90</b>                     | <b>9.87</b>                     | <b>0.82</b>        | <b>0.307</b> |

**S3 Table. Impact of relative weighting of telomere length and YFV data.**

Parameter estimates (and medians) estimated using the explicit heterogeneity model for the five weighting strategies in S1 Fig. The table shows half-life estimates for the  $T_{SCM1}$  and  $T_{SCM2}$  populations respectively, the relative size of the  $T_{SCM2}$  subpopulation ( $T_{SCM2}/T_{SCM}$ ), and the fraction of cells generated from each clonal burst that enter the long-lived  $T_{SCM2}$  subpopulation ( $f$ ). Different rows (for a given individual) correspond to different weighting strategies, where the weights applied to the yellow fever virus (YF) and telomere length (T) datasets are indicated in the second column “weight combination”, and the weight applied to the labelling dataset was in all cases 0.5.
