# Supplementary material for: Human TSCM cell dynamics in vivo are compatible with long-lived immunological memory and stemness
Source: PLOS journal article supplement (doi:10.1371/journal.pbio.2005523), 2018-06-22
Supplement: S9 (10.1371/journal.pbio.2005523.s009) [file journal.pbio.2005523.s009]

## Supplementary Methods

### The explicit kinetic heterogeneity model for telomere length data

Following de Boer et al. [1], we derived an ODE model to describe the change in the average telomere lengths in the  $T_N$  population and in each of the  $T_{SCM}$  subpopulations ( $T_{SCM1}$  and  $T_{SCM2}$ ) under the explicit kinetic heterogeneity model. Each of the three populations considered ( $T_N$ ,  $T_{SCM1}$  and  $T_{SCM2}$ ) was modelled as a series of  $n$  compartments. The equations for the number of cells in the  $T_{Ni}$ ,  $T_{SCM1i}$  and  $T_{SCM2i}$  compartments are:

$$\dot{T}_{Ni} = 2p_n T_{N_{i-1}} - (p_n + \Delta + d_n) T_{Ni} \quad (S1)$$

$$\dot{T}_{SCM1i} = 2p_{s1} T_{SCM1_{i-1}} - (p_{s1} + d_{s1}) T_{SCM1i} + \Delta f 2^k T_{N_{i-C}} \quad (S2)$$

$$\dot{T}_{SCM2i} = 2p_{s2} T_{SCM2_{i-1}} - (p_{s2} + d_{s2}) T_{SCM2i} + \Delta(1-f) 2^k T_{N_{i-C}} \quad (S3)$$

where  $p_n$ ,  $f$ ,  $\Delta$ ,  $d_n$ ,  $p_s$ ,  $d_s$ ,  $k$  and  $C$  are as in Methods. The equations for the average number of divisions undergone by cells in the  $T_N$ ,  $T_{SCM1}$  and the  $T_{SCM2}$  pools (following the derivation in [1]) are:

$$\dot{\mu}_{TN} = 2p_n \quad (S4)$$

$$\dot{\mu}_{TSCM1} = 2p_{s1} - \Delta f 2^k \frac{T_N}{T_{SCM1}} (\mu_{TSCM1} - \mu_{TN} - C) \quad (S5)$$

$$\dot{\mu}_{TSCM2} = 2p_{s2} - \Delta(1-f) 2^k \frac{T_N}{T_{SCM2}} (\mu_{TSCM2} - \mu_{TN} - C) \quad (S6)$$

If  $\delta$  is the number of base pairs (bp) lost in each division then, by multiplying  $\mu_{TN}$ ,  $\mu_{TSCM1}$  and  $\mu_{TSCM2}$  by  $\delta$ , the average telomere lengths (in units of bp) are obtained. So the difference between the average telomere lengths of the  $T_N$  and the  $T_{SCM}$  pool is described by:

$$\dot{\Theta} = \delta \left( \frac{T_{SCM1}}{T_{SCM}} \dot{\mu}_{TSCM1} + \frac{T_{SCM2}}{T_{SCM}} \dot{\mu}_{TSCM2} - \dot{\mu}_{TN} \right) \quad (S7)$$

### Fitting procedure

In the first part of the study, stable isotope labelling and telomere length data were fitted simultaneously. Isotope labelling residuals were normalized by the sum of the observations to guarantee equal contribution of all data points, and the combined sum of squares score was computed giving the same weight to both isotope labelling and telomere length data. The free parameters in the implicit heterogeneous model (equations 9, 10 and 25) were  $p_n$ ,  $\Delta$ ,  $k$ ,  $p_s$ ,  $d_s^*$ , the ratio of  $T_N$  to  $T_{SCM}$  cells ( $T_N / T_{SCM}$ ) and  $C$ . During the fitting procedure, the ratio  $T_N / T_{SCM}$  was assumed to lie within the range 6 to 120. These bounds were estimated given that the fractions of peripheral blood CD4<sup>+</sup> and CD8<sup>+</sup> naïve T cells are typically 35% and 40% respectively [2], the fraction of peripheral blood  $T_{SCM}$  cells is typically 2-3% [2, 3], and the ratio

of the total number of  $T_N$  to  $T_{SCM}$  cells in the lymph nodes can be double the ratio observed in peripheral blood (at least in macaques [2]).

In the second part of the study, isotope labelling, telomere length data and YFV tetramer data were fitted simultaneously. The parameters  $\alpha$ ,  $\beta$ , and  $r$  of the two exponentials YFV model in equation 28 were equated to the net disappearance rates  $d_{s1}-p_{s1}$ ,  $d_{s2}-p_{s2}$ , and to the ratio  $T_{SCM2}/T_{SCM}$  in equations 18, 19 and S7. In the first instance the sum of squares for labelling, telomere length and YFV were weighted in the ratio 0.5 : 0.25 : 0.25. This is essentially a subjective choice that was made because we wanted the labelling data to be the most informative with 50% of the weight (the telomere length data represented only a single timepoint, and the YFV data were cross-sectional and obtained from unrelated individuals). Other weighting schemes were also considered and discussed in the text. The free parameters were  $p_n$ ,  $\Delta$ ,  $f$ ,  $k$ ,  $p_{s1}$ ,  $p_{s2}$ , the ratio of  $T_N$  to  $T_{SCM}$  cells ( $T_N/T_{SCM}$ ), the relative size of the two  $T_{SCM}$  subpopulations ( $T_{SCM2}/T_{SCM}$ ) and  $C$ .  $d_{s1}$  and  $d_{s2}$  were eliminated using the steady state constraints  $(1-f)2^k\Delta T_N + p_{s1}T_{SCM1} = d_{s1}T_{SCM1}$  and  $f2^k\Delta T_N + p_{s2}T_{SCM2} = d_{s2}T_{SCM2}$ .

The 95% confidence intervals of parameter estimates were calculated by creating 1000 bootstrap datasets (i.e. sampling from the data with replacement), fitting the model of interest to each dataset, estimating the parameters and then taking the upper and lower 2.5% percentiles of the resulting 1000 parameter estimates.

### Summary of different modelling approaches

| MODEL                  | DATA FITTED                           | RATIONALE                                                                                                                                                                                                                                                   | RESULTS REPORTED                                  |
|------------------------|---------------------------------------|-------------------------------------------------------------------------------------------------------------------------------------------------------------------------------------------------------------------------------------------------------------|---------------------------------------------------|
| Implicit heterogeneous | CD4 & CD8 labelling & telomere length | Test whether the $T_{SCM}$ population is homogeneous by comparing fits of homogeneous and heterogeneous versions of the basic model (chosen because models are nested and have similar numbers of free parameters) & estimate average population parameters | Fig 2, Fig 3, S1 Table                            |
| Explicit heterogeneous | CD8 labelling, telomere length, YFV   | Estimate subpopulation parameters                                                                                                                                                                                                                           | Fig 4, Fig 5, Table 1, S1 Fig, S2 Table, S3 Table |
|                        | CD4 & CD8 labelling, telomere length  | Test whether a slow and a rapid $T_{SCM}$ subpopulation are compatible with the data independent of YFV data.                                                                                                                                               | S2 Fig, S3 Fig                                    |

## Supplementary References

1. De Boer RJ, Noest AJ. T cell renewal rates, telomerase, and telomere length shortening. *J Immunol.* 1998;160(12):5832-7.
2. Lugli E, Dominguez MH, Gattinoni L, Chattopadhyay PK, Bolton DL, Song K, et al. Superior T memory stem cell persistence supports long-lived T cell memory. *The Journal of clinical investigation.* 2013;123(2):594-9.
3. Gattinoni L, Lugli E, Ji Y, Pos Z, Paulos CM, Quigley MF, et al. A human memory T cell subset with stem cell-like properties. *Nat Med.* 2011;17(10):1290-7.
4. Bains I, Antia R, Callard R, Yates AJ. Quantifying the development of the peripheral naive CD4(+) T-cell pool in humans. *Blood.* 2009;113(22):5480-7.
5. Neller MA, Ladell K, McLaren JE, Matthews KK, Gostick E, Pentier JM, et al. Naive CD8(+) T-cell precursors display structured TCR repertoires and composite antigen-driven selection dynamics. *Immunol Cell Biol.* 2015;93(7):625-33.
